# Supplementary material for: Ethylenediamine-functionalized magnetic Fe3O4@SiO2 nanoparticles: cooperative trifunctional catalysis for selective synthesis of nitroalkenes
Source: Royal Society of Chemistry journal article supplement (doi:10.1039/c5ra11798d), 2015-01-01
Supplement: c5ra11798d1.pdf [file c5ra11798d1.pdf]

## **Electronic Supplementary Information**

### **Ethylenediamine-functionalized Magnetic Fe<sub>3</sub>O<sub>4</sub>@SiO<sub>2</sub> Nanoparticles: cooperative trifunctional catalysis for selective synthesis of nitroalkenes**

Fengjun Xue,<sup>ab</sup> Yahao Dong,<sup>ab</sup> Peibo Hu,<sup>ab</sup> Yanan Deng<sup>ab</sup> and Yuping  
Wei<sup>\*ab</sup>

<sup>a</sup>Department of Chemistry, School of Science, Tianjin University, Tianjin  
300072, P.R.China

<sup>b</sup>Collaborative Innovation Center of Chemical Science and Engineering  
(Tianjin), Tianjin 300072, P.R.China

\*Corresponding Author. Tel and Fax: +86 22 27403475; E-mail:  
ypwei@tju.edu.cn

#### **Table of contents**

|                                                       |       |
|-------------------------------------------------------|-------|
| Table                                                 | Page  |
| List of Products                                      | S2-S3 |
| References                                            | S4    |
| Copies of <sup>1</sup> H NMR Spectra of all compounds | S5-S9 |

## List of Products

### 1. <sup>1</sup>H NMR spectra data of the products.

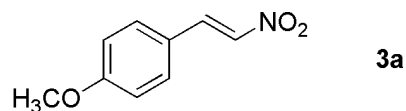

Yellow solid; <sup>1</sup>H NMR (400 MHz, CDCl<sub>3</sub>) δ = 7.98 (d, *J* = 13.6 Hz, 1H), 7.53 (dd, *J* = 11.1, 6.6 Hz, 3H), 6.98 (d, *J* = 8.7 Hz, 2H), 3.89 (s, 3H).<sup>1</sup>

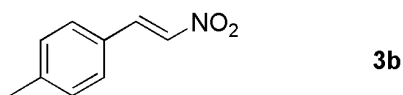

Yellow solid; <sup>1</sup>H NMR (400 MHz, CDCl<sub>3</sub>) δ = 8.01 (d, *J* = 13.6 Hz, 1H), 7.60 (d, *J* = 13.6 Hz, 1H), 7.47 (d, *J* = 8.0 Hz, 2H), 7.29 (d, *J* = 7.8 Hz, 2H), 2.44 (s, 3H).<sup>2</sup>

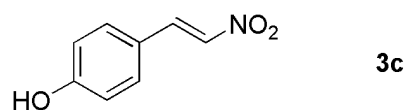

Yellow solid; <sup>1</sup>H NMR (400 MHz, CDCl<sub>3</sub>) δ = 8.01 (d, *J* = 13.6 Hz, 1H), 7.55 (d, *J* = 13.6 Hz, 1H), 7.50 (d, *J* = 8.5 Hz, 2H), 6.94 (d, *J* = 8.5 Hz, 2H), 4.84 - 4.70 (m, 1H).<sup>3</sup>

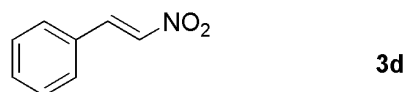

Yellow solid; <sup>1</sup>H NMR (400 MHz, CDCl<sub>3</sub>) δ = 8.04 (d, *J* = 13.7 Hz, 1H), 7.62 (d, *J* = 13.7 Hz, 1H), 7.60 - 7.45 (m, 5H).<sup>2</sup>

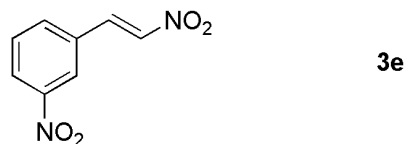

Yellow solid; <sup>1</sup>H NMR (400 MHz, CDCl<sub>3</sub>) δ = 8.45 (s, 1H), 8.38 (d, *J* = 8.2 Hz, 1H), 8.08 (d, *J* = 13.7 Hz, 1H), 7.90 (d, *J* = 7.7 Hz, 1H), 7.75 - 7.66 (m, 2H).<sup>4</sup>

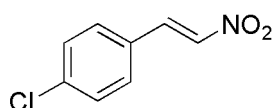

**3f**

Light yellowish solid;  $^1\text{H NMR}$  (400 MHz,  $\text{CDCl}_3$ )  $\delta = 7.99$  (d,  $J = 13.7$  Hz, 1H), 7.60 (d,  $J = 13.7$  Hz, 1H), 7.52 (d,  $J = 8.5$  Hz, 2H), 7.46 (d,  $J = 8.5$  Hz, 2H).<sup>2</sup>

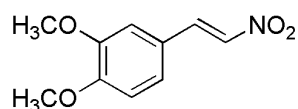

**3g**

Yellow solid;  $^1\text{H NMR}$  (400 MHz,  $\text{CDCl}_3$ )  $\delta = 8.16 - 7.87$  (m, 1H), 7.70 - 7.49 (m, 1H), 7.33 - 7.15 (m, 1H), 7.13 - 6.75 (m, 2H), 3.97 (s, 6H).<sup>4</sup>

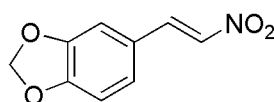

**3h**

Orange yellow solid;  $^1\text{H NMR}$  (400 MHz,  $\text{CDCl}_3$ )  $\delta = 7.96$  (d,  $J = 13.5$  Hz, 1H), 7.51 (d,  $J = 13.5$  Hz, 1H), 7.12 (d,  $J = 7.7$  Hz, 1H), 7.04 (s, 1H), 6.91 (d,  $J = 7.9$  Hz, 1H), 6.10 (s, 2H).<sup>4</sup>

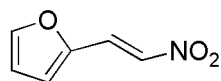

**3i**

Yellow solid;  $^1\text{H NMR}$  (400 MHz,  $\text{CDCl}_3$ )  $\delta = 7.81$  (d,  $J = 13.2$  Hz, 1H), 7.64 - 7.51 (m, 2H), 6.92 (d,  $J = 3.4$  Hz, 1H), 6.61 (dd,  $J = 3.3, 1.7$  Hz, 1H).

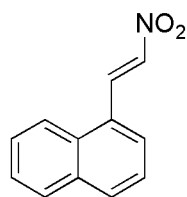

**3j**

Yellow solid;  $^1\text{H NMR}$  (400 MHz,  $\text{CDCl}_3$ )  $\delta = 8.85$  (d,  $J = 13.4$  Hz, 1H), 8.14 (t,  $J = 7.9$  Hz, 1H), 8.02 (t,  $J = 6.6$  Hz, 1H), 7.95 (d,  $J = 7.8$  Hz, 1H), 7.76 (t,  $J = 6.5$  Hz, 1H), 7.70 - 7.59 (m, 3H), 7.54 (t,  $J = 7.7$  Hz, 1H).<sup>4</sup>

## References

1. Y. M. McNamara, S. M. Cloonan, A. J. S. Knox, J. J. Keating, S. G. Butler, G. H. Peters, M. J. Meegan and D. C. Williams, *Bioorg. Med. Chem.*, 2011, **19**, 1328-1348.
2. M. Zhang, P. Hu, J. Zhou, G. Wu, S. J. Huang and W. P. Su, *Org. Lett.*, 2013, **15**, 1718-1721.
3. K. Kiyokawa, T. Nagata, J. P. Hayakawa and S. Minakata, *Chem. Eur. J.*, 2015, **21**, 1280-1285.
4. S. Manna, S. Jana, T. Saboo, A. Maji and D. Maiti, *Chem. Commun.*, 2013, **49**, 5286-5288.

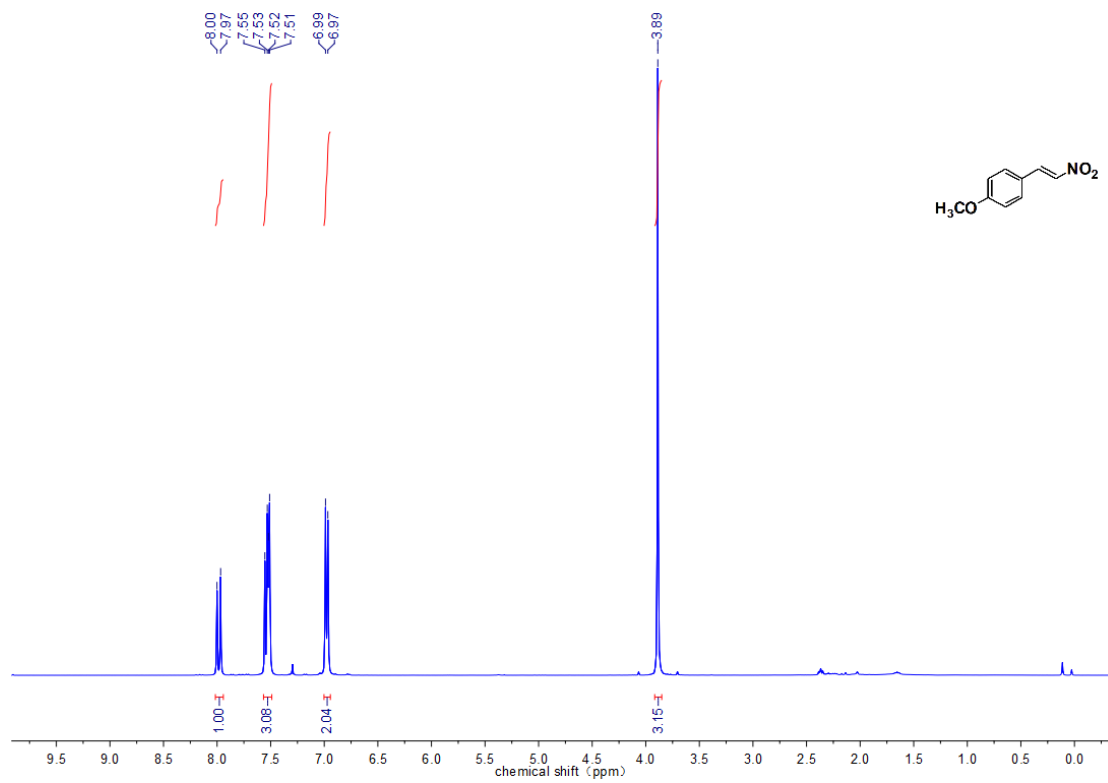

Fig. S1  $^1\text{H}$  NMR spectra of 3a in  $\text{CDCl}_3$

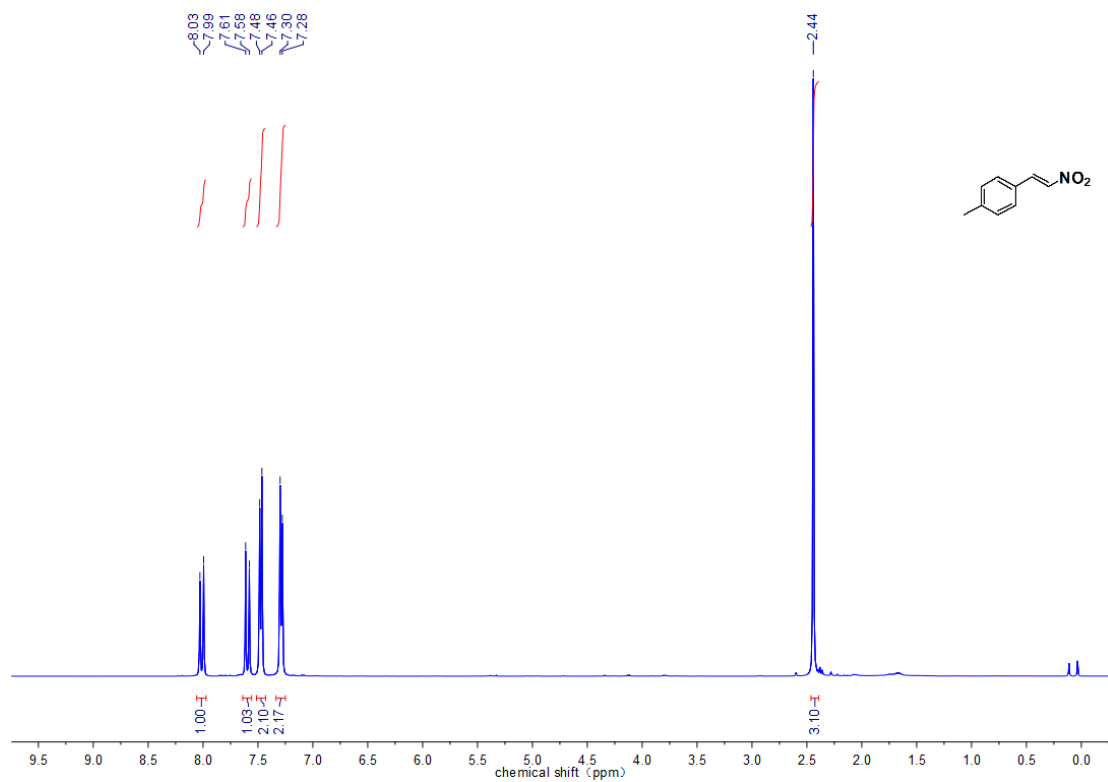

Fig. S2  $^1\text{H}$  NMR spectra of 3b in  $\text{CDCl}_3$

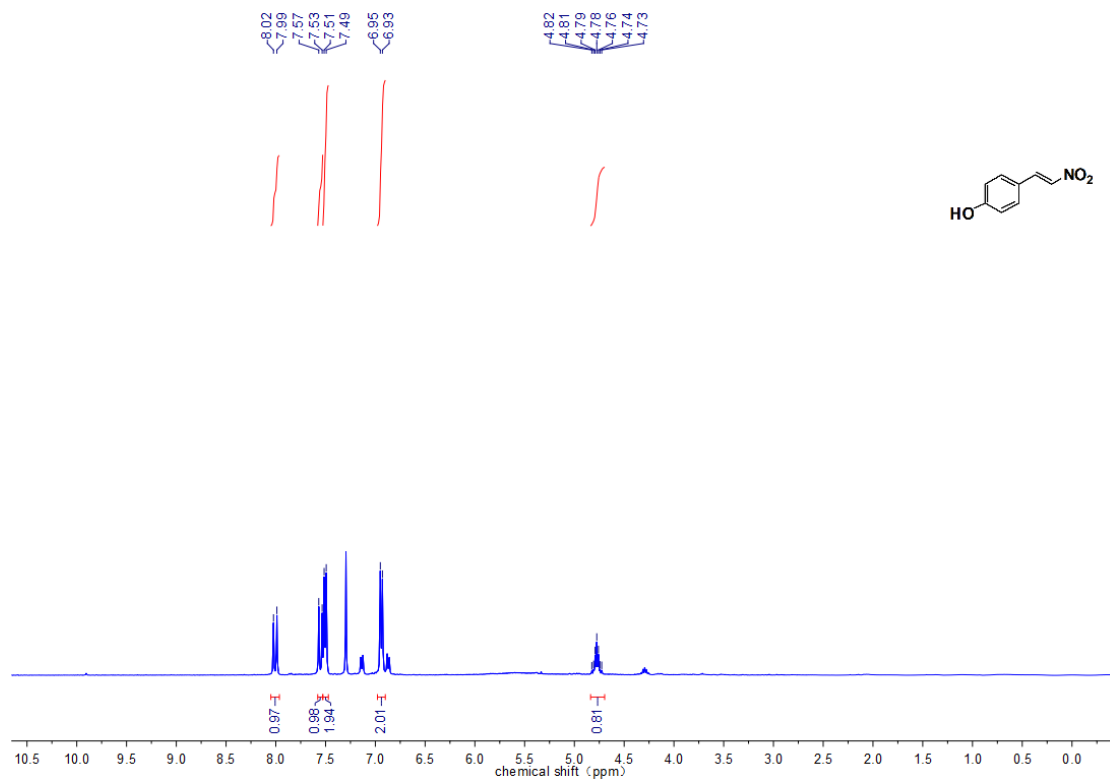

Fig. S3  $^1\text{H}$  NMR spectra of 3c in  $\text{CDCl}_3$

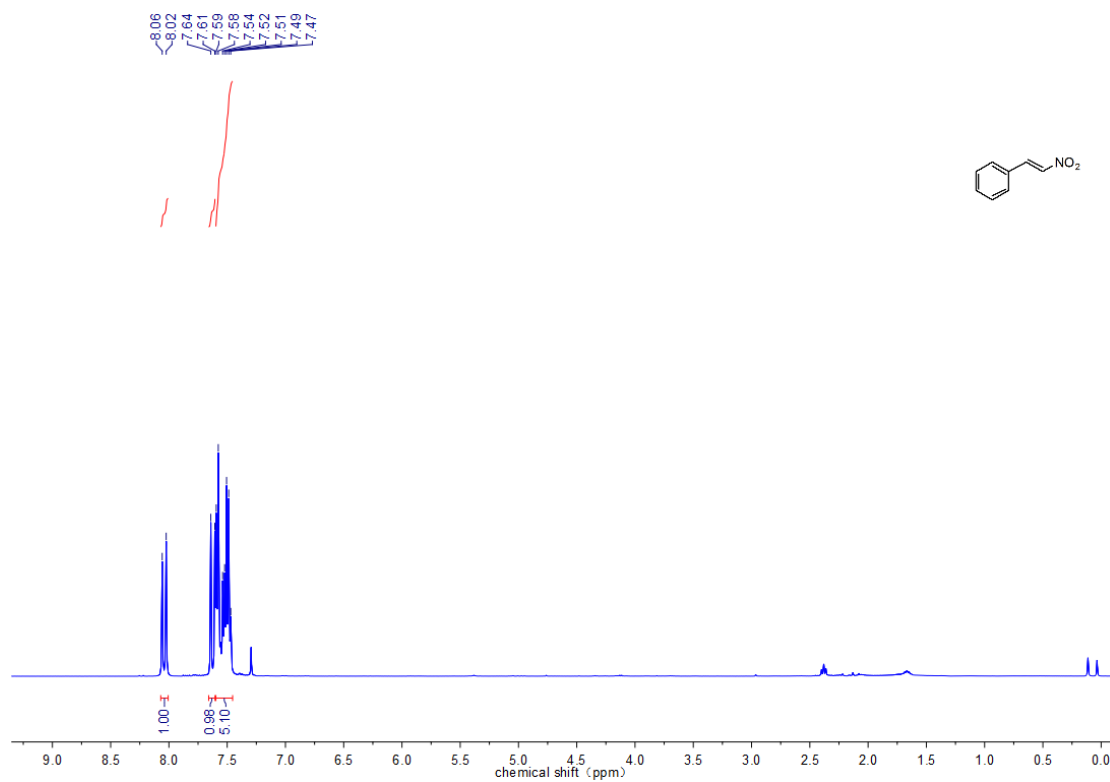

Fig. S4  $^1\text{H}$  NMR spectra of 3d in  $\text{CDCl}_3$

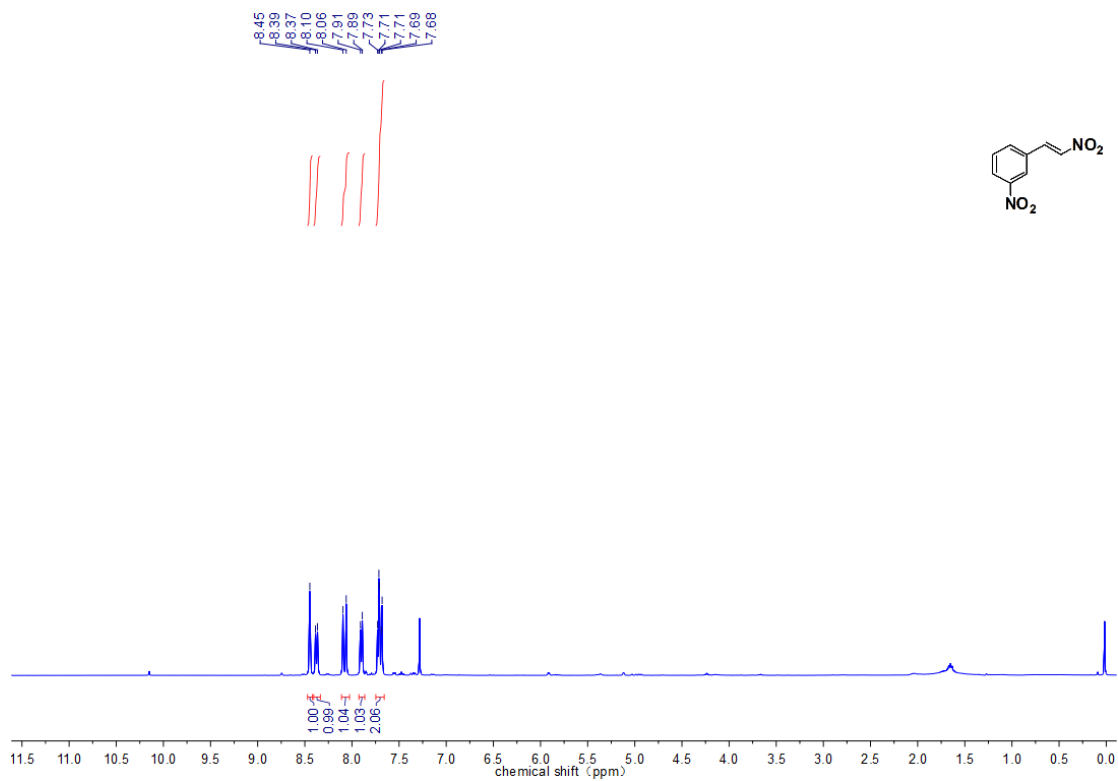

Fig. S5  $^1\text{H}$  NMR spectra of 3e in  $\text{CDCl}_3$

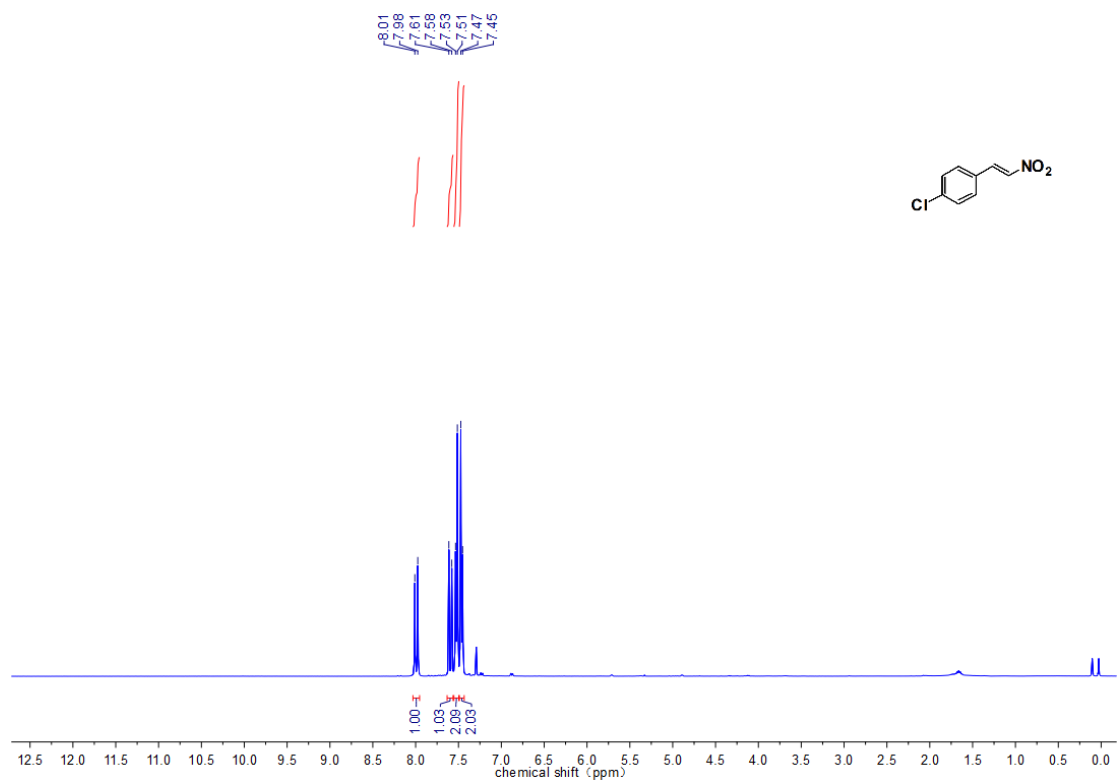

Fig. S6  $^1\text{H}$  NMR spectra of 3f in  $\text{CDCl}_3$

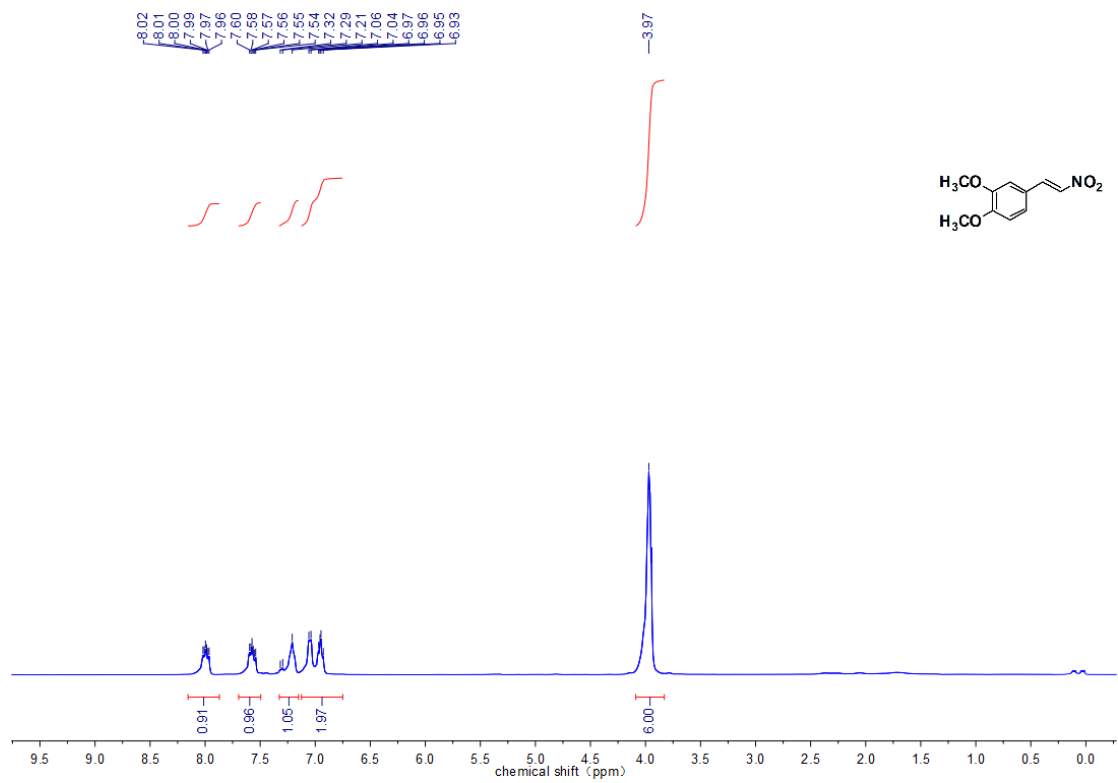

Fig. S7  $^1\text{H}$  NMR spectra of 3g in  $\text{CDCl}_3$

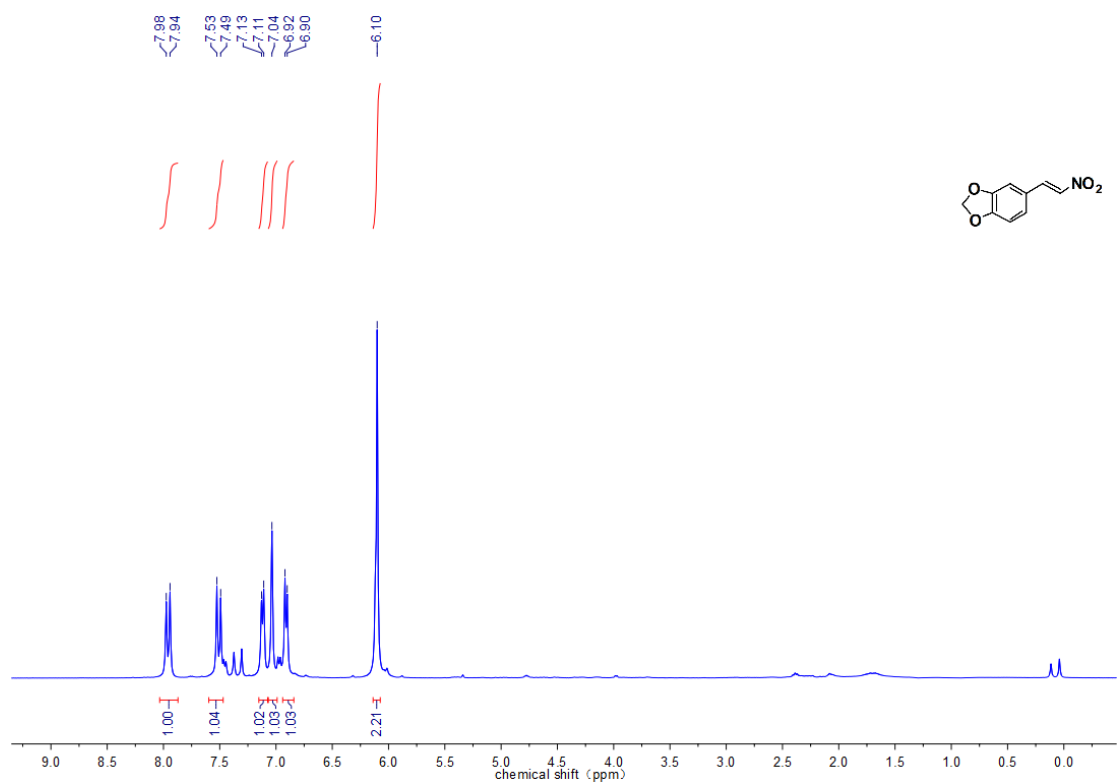

Fig. S8  $^1\text{H}$  NMR spectra of 3h in  $\text{CDCl}_3$



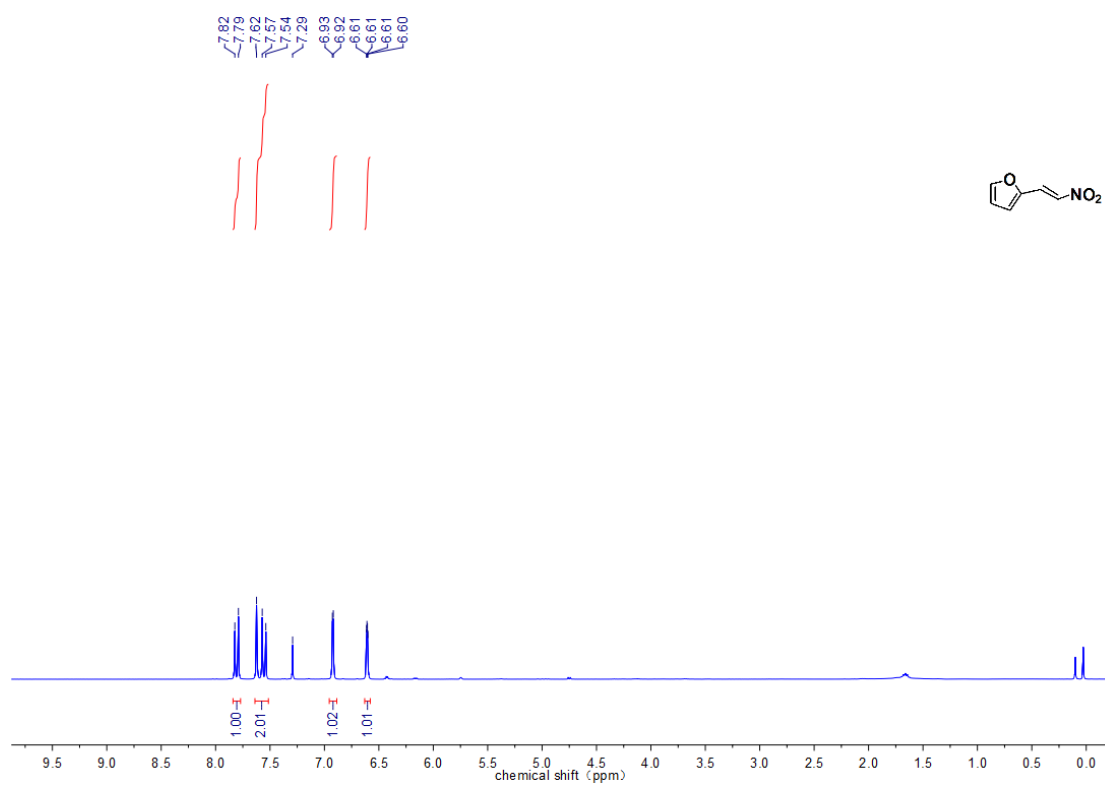

Fig. S9  $^1\text{H}$  NMR spectra of 3i in  $\text{CDCl}_3$

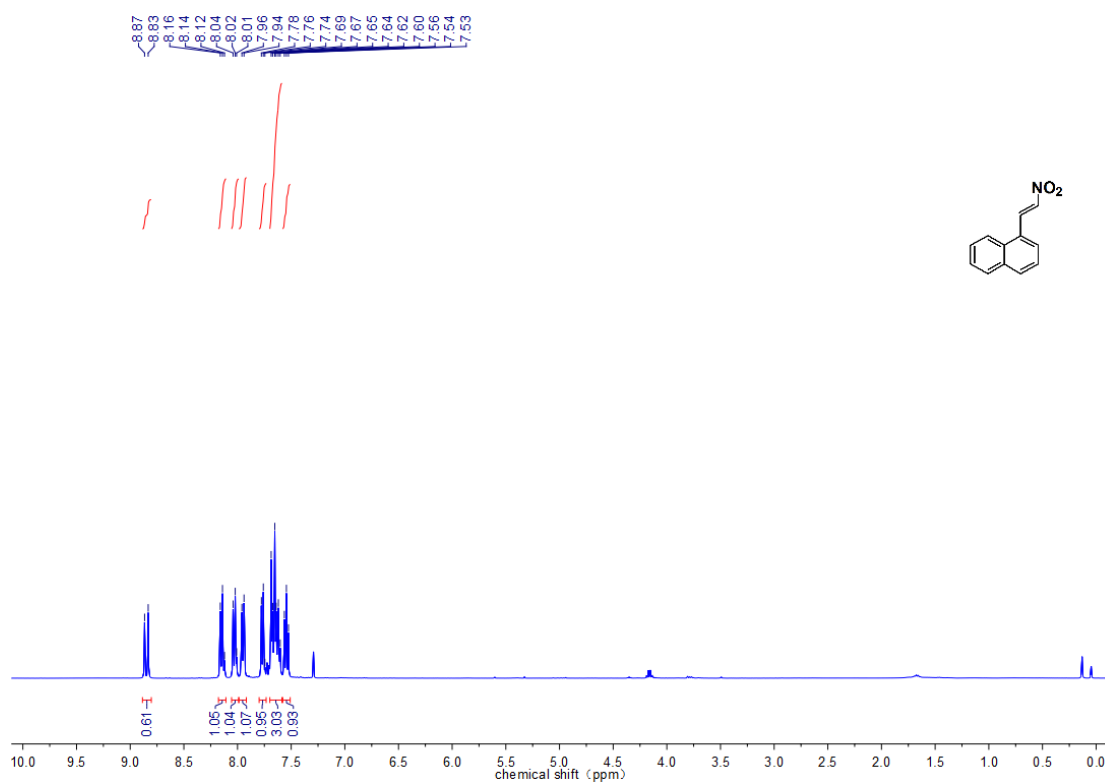

Fig. S10  $^1\text{H}$  NMR spectra of 3j in  $\text{CDCl}_3$
